# Supplementary material
Source: PubMed Central journal article supplement (PMC4529076)
Supplement: Supp_Table1.pdf [file Supp_Table1.pdf]

## Supplementary Data

SUPPLEMENTARY TABLE S1. FORWARD AND REVERSE PRIMER SEQUENCES  
FOR qRT-PCR DETECTION OF COL1A1 AND  $\beta$ -ACTIN

| <i>Primer</i>            | <i>Forward</i>        | <i>Reverse</i>        |
|--------------------------|-----------------------|-----------------------|
| Col1a1<br>$\beta$ -Actin | CATGTACGTTGCTATCCAGGC | CTCCTTAATGTCACGCACGAT |

Primers used for qRT-PCR analysis of *RUNX2*, *OCN*, *FABP4*, *LPL*, and *PPARG* expression.  
qRT-PCR, quantitative real-time-polymerase chain reaction.
