# Supplementary material
Source: PubMed Central journal article supplement (PMC4529076)
Supplement: Supp_Table2.pdf [file Supp_Table2.pdf]

SUPPLEMENTARY TABLE S2. SURFACE MARKER EXPRESSION WITH GENE ID/CD NOMENCLATURE

| <i>CD</i> | <i>Gene ID</i> | <i>Undifferentiated</i> | <i>Adipogenic</i> | <i>Osteogenic</i> |
|-----------|----------------|-------------------------|-------------------|-------------------|
| CD1a      | CD1A           | 0.256                   | 0.012             | 0.175             |
| CD1b      | CD1B           | 0.389                   | 0.094             | 0                 |
| CD1d      | CD1D           | 0.187                   | 4.15              | 0                 |
| CD2       | CD2            | 0.979                   | 0.662             | 0.037             |
| CD3       | CD3            | 0.837                   | 0.268             | 2.55              |
| CD4       | CD4            | 0.215                   | 1.83              | 0.011             |
| CD4v4     | CD4            | 0.221                   | 1.09              | 0.404             |
| CD5       | CD5            | 0.489                   | 0.558             | 2.83              |
| CD6       | CD6            | 0.254                   | 0.557             | 0.199             |
| CD7       | CD7            | 0.306                   | 0.295             | 0.397             |
| CD8a      | CD8A           | 0.769                   | 0.162             | 0.826             |
| CD8b      | CD8B           | 0.247                   | 0.681             | 2.87              |
| CD9       | CD9            | 72.8                    | 18.4              | 15.8              |
| CD10      | MME            | 98.2                    | 83.9              | 81.3              |
| CD11a     | ITGAL          | 0.349                   | 0.277             | 3.21              |
| CD11b     | ITGAM          | 0.695                   | 0.198             | 2.95              |
| CD11c     | ITGAX          | 0.909                   | 8.11              | 3.44              |
| CD13      | ANPEP          | 99.1                    | 94.5              | 95.7              |
| CD14      | CD14           | 0.262                   | 5.51              | 4.15              |
| CD15      | FUT4           | 0.303                   | 1.87              | 0.678             |
| CD15s     | FUT4           | 0.182                   | 0.507             | 0.707             |
| CD16      | FCGR3          | 0.678                   | 0.535             | 0.201             |
| CD18      | ITGB2          | 0.168                   | 12.13             | 5.21              |
| CD19      | CD19           | 0.026                   | 0.493             | 0.759             |
| CD20      | MS4A1          | 0.044                   | 0.285             | 0.975             |
| CD21      | CR2            | 0                       | 0.187             | 0.642             |
| CD22      | CD22           | 0.221                   | 0.069             | 0.056             |
| CD23      | FCER2          | 0.725                   | 0.642             | 0.528             |
| CD24      | CD24           | 0.126                   | 0.723             | 2.89              |
| CD25      | IL2RA          | 0.422                   | 0.13              | 0.273             |
| CD26      | DPP4           | 96.8                    | 34.7              | 34.4              |
| CD27      | CD27           | 0.205                   | 0.066             | 0.031             |
| CD28      | CD28           | 0.721                   | 0.738             | 0.924             |
| CD29      | ITGB1          | 93.5                    | 62.2              | 23.9              |
| CD30      | TNFRSF8        | 0.269                   | 0.652             | 0.983             |
| CD31      | PECAM1         | 0.773                   | 6.71              | 0.244             |
| CD32      | FCGR2          | 0.013                   | 6.63              | 3.54              |
| CD33      | CD33           | 0.628                   | 0.313             | 0.992             |
| CD34      | CD34           | 14.8                    | 37.4              | 12.6              |
| CD35      | CR1            | 0.5                     | 0.865             | 0.092             |
| CD36      | CD36           | 17.7                    | 56.7              | 4.7               |
| CD37      | CD37           | 0.782                   | 0.578             | 0                 |
| CD38      | CD38           | 0.22                    | 0.113             | 0.621             |
| CD39      | ENTPD1         | 0.64                    | 0.675             | 0.214             |
| CD40      | CD40           | 16.1                    | 28.2              | 1.45              |
| CD41a     | ITGA2B         | 0.929                   | 0.839             | 0.218             |
| CD41b     | CD41B          | 0.141                   | 0.475             | 0.712             |
| CD42a     | GP9            | 0.551                   | 0.768             | 0.423             |
| CD42b     | GP1BA          | 0.269                   | 0.132             | 0.172             |
| CD43      | SPN            | 0.659                   | 2.51              | 2.87              |
| CD44      | CD44           | 99.6                    | 88.8              | 91.9              |
| CD45      | PTPRC          | 0.908                   | 9.5               | 2.11              |
| CD45RA    | PTPRC          | 0.048                   | 0.489             | 0.133             |
| CD45RB    | PTPRC          | 0.728                   | 1.53              | 7.15              |
| CD45RO    | PTPRC          | 0.17                    | 5.65              | 3.64              |
| CD46      | CD46           | 99.8                    | 75.8              | 7.4               |
| CD47      | CD47           | 95.7                    | 65.3              | 87.3              |
| CD48      | CD48           | 0.264                   | 0.963             | 0.506             |
| CD49a     | ITGA1          | 87.4                    | 68.6              | 9.11              |
| CD49b     | ITGA2          | 60.8                    | 26.2              | 5.51              |
| CD49c     | ITGA3          | 55.3                    | 15.1              | 2.26              |
| CD49d     | ITGA4          | 90.8                    | 25.9              | < 1               |

(continued)

SUPPLEMENTARY TABLE S2. (CONTINUED)

| <i>CD</i>     | <i>Gene ID</i> | <i>Undifferentiated</i> | <i>Adipogenic</i> | <i>Osteogenic</i> |
|---------------|----------------|-------------------------|-------------------|-------------------|
| CD49e         | ITGA5          | 99.8                    | 91.2              | 55.5              |
| CD50          | ICAM3          | 0.939                   | 0.653             | 1.58              |
| CD51/61       | ITGAV          | 97.8                    | 66.8              | 59.1              |
| CD53          | CD53           | 0.881                   | 5.12              | 3.67              |
| CD54          | ICAM1          | 94.8                    | 20.8              | 29.4              |
| CD55          | CD55           | 99.9                    | 50.7              | 8.77              |
| CD56          | NCAM1          | 0.682                   | 0.355             | 0.565             |
| CD57          | B3GAT1         | 0.308                   | 0.93              | 1.66              |
| CD58          | CD58           | 99.3                    | 55.9              | 19.8              |
| CD59          | CD59           | 100                     | 88.4              | 96.2              |
| CD61          | ITGB3          | 91.7                    | 74.5              | 61.4              |
| CD62E         | SELE           | 0.186                   | 0.178             | 0.892             |
| CD62L         | SELL           | 0.016                   | 0.398             | 0.133             |
| CD62P         | SELP           | 0                       | 0.529             | 0.32              |
| CD63          | CD63           | 70.2                    | 92.3              | 82.1              |
| CD64          | FCGR1          | 0.639                   | 0.764             | 3.87              |
| CD66(a.c.d.e) | CECAM1         | 0.594                   | 0.785             | 2.55              |
| CD66b         | CECAM8         | 0.655                   | 0.366             | 0.882             |
| CD66f         | PSG1           | 0.039                   | 0.944             | 0.418             |
| CD69          | CD69           | 0.59                    | 0.376             | 0.818             |
| CD70          | CD70           | 0.836                   | 0.497             | 0.219             |
| CD71          | TFRC           | 41.9                    | 17.8              | 3.34              |
| CD72          | CD72           | 0.141                   | 0.115             | 0.371             |
| CD73          | NT5E           | 99.2                    | 79.4              | 75.3              |
| CD74          | CD74           | 0.92                    | 0.208             | 0.114             |
| CD75          | ST6GAL1        | 0.389                   | 0.412             | 0.332             |
| CD77          | A4GALT         | 0.486                   | 6.76              | 0.652             |
| CD79b         | CD79b          | 0.496                   | 0.43              | 0.612             |
| CD80          | CD80           | 0.982                   | 0.838             | 0.884             |
| CD81          | CD81           | 99.8                    | 91.5              | 96.6              |
| CD83          | CD83           | 0.014                   | 0.365             | 0.04              |
| CD84          | CD84           | 0.818                   | 6.45              | 4.85              |
| CD85          | LILRA5         | 0.896                   | 3.65              | 3.11              |
| CD86          | CD86           | 0.83                    | 6.36              | 2.55              |
| CD87          | PLAUR          | 0.94                    | 0.502             | 0.994             |
| CD88          | C5AR1          | 0.395                   | 1.81              | 0.094             |
| CD89          | FCAR           | 0.837                   | 0.023             | 0.83              |
| CD90          | THY1           | 98.8                    | 94.9              | 93.5              |
| CD91          | LRP1           | 16.3                    | 7.09              | 0.528             |
| CDw93         | CD93           | 0.655                   | 0.434             | 0.921             |
| CD94          | KLRD1          | 0.044                   | 0.498             | 0.467             |
| CD95          | FAS            | 98.2                    | 56.8              | 83.2              |
| CD97          | CD97           | 2.22                    | 12.8              | 0.704             |
| CD98          | SLC7A5         | 99.8                    | 85.7              | 88.3              |
| CD99          | CD99           | 99.1                    | 68.3              | 4.64              |
| CD99R         | CD99           | 32.8                    | 13.8              | 0.159             |
| CD100         | SEMA4D         | 0.123                   | 0.903             | 0.386             |
| CD102         | ICAM2          | 1.95                    | 0.59              | 5.33              |
| CD103         | ITGAE          | 0                       | 0.028             | 0.583             |
| CD105         | ENG            | 95.2                    | 50.8              | 0.929             |
| CD106         | VCAM1          | 2.67                    | 2.41              | 0.633             |
| CD107a        | LAMP1          | 4.89                    | 28.3              | 30.5              |
| CD107b        | LAMP2          | 1.53                    | 29.9              | 14.2              |
| CD108         | SEMA7A         | 9.75                    | 0.292             | 2.85              |
| CD109         | CD109          | 22.8                    | 3.45              | 0.036             |
| CD112         | PVRL2          | 0.179                   | 0.927             | 0.804             |
| CD114         | CSF3R          | 0.586                   | 0.974             | 0                 |
| CD116         | CSF2RA         | 0.036                   | 0.284             | 0.507             |
| CD117         | KIT            | 0.184                   | 0.556             | 0.961             |
| CD118         | LIFR           | 0.077                   | 0.495             | 0.143             |
| CD119         | IFNGR1         | 1.33                    | 9.51              | 0.002             |
| CD120a        | TNFRSF1A       | 0.31                    | 14.8              | 0.24              |

(continued)

SUPPLEMENTARY TABLE S2. (CONTINUED)

| <i>CD</i> | <i>Gene ID</i> | <i>Undifferentiated</i> | <i>Adipogenic</i> | <i>Osteogenic</i> |
|-----------|----------------|-------------------------|-------------------|-------------------|
| CD121a    | IL1R1          | 0.496                   | 0.287             | 0.674             |
| CD121b    | IL1R2          | 0.691                   | 0.193             | 0.207             |
| CD122     | IL2RB          | 0.932                   | 0.043             | 0.652             |
| CD123     | IL3RA          | 0.218                   | 0.549             | 0.327             |
| CD124     | IL4R           | 0.099                   | 0.359             | 0.435             |
| CD126     | IL6R           | 0.335                   | 0.884             | 0.022             |
| CD127     | IL7R           | 0.226                   | 0.552             | 0.142             |
| CD128b    | CXCR2          | 0                       | 0.672             | 0.969             |
| CD130     | IL6ST          | 13.3                    | 5.86              | 0.069             |
| CD134     | TNFRSF4        | 0.671                   | 0.378             | 0.888             |
| CD135     | FLT3           | 0.866                   | 0.896             | 0.553             |
| CD137     | TNFRSF9        | 0.214                   | 0.606             | 0.017             |
| CD137L    | TNFSF9         | 0.966                   | 0.034             | 0.095             |
| CD138     | SDC1           | 66.8                    | 1.75              | 0.107             |
| CD140a    | PDGFRA         | 59.1                    | 26.3              | 3.98              |
| CD140b    | PDGFRB         | 97.4                    | 49.3              | 3.53              |
| CD141     | THBD           | 62.7                    | 28.3              | 0.563             |
| CD142     | F3             | 86.2                    | 59.8              | 1.91              |
| CD144     | CDH5           | 0.253                   | 0.178             | 0.742             |
| CD146     | MCAM           | 11.8                    | 41.2              | 0.474             |
| CD147     | BSG            | 100                     | 98.4              | 99.6              |
| CD150     | SLAMF1         | 0.762                   | 0.525             | 0.114             |
| CD151     | CD151          | 98.6                    | 74.9              | 3.67              |
| CD152     | CTLA4          | 0.198                   | 0.829             | 2.58              |
| CD153     | TNFSF8         | 0.337                   | 0.439             | 0.141             |
| CD154     | CD40L          | 0.584                   | 0.971             | 0.5               |
| CD158a    | KIR2DL1        | 0.031                   | 0.731             | 0.342             |
| CD158b    | KIR2DL3        | 0.076                   | 0.434             | 0.497             |
| CD161     | KLRB1          | 0.15                    | 0.329             | 0.557             |
| CD162     | SEPLG          | 0.978                   | 7.31              | 0.036             |
| CD163     | CD163          | 0                       | 5.99              | 0.888             |
| CD164     | CD164          | 5.07                    | 44.1              | 84                |
| CD165     | CD165          | 85.8                    | 33.6              | 0.0642            |
| CD166     | ALCAM          | 98.5                    | 35.7              | 0.769             |
| CD171     | L1CAM          | 2.54                    | 0.5               | 2.98              |
| CD172b    | SIRPB1         | 0.574                   | 0.002             | 0.719             |
| CD177     | CD177          | 0.5                     | 0.136             | 0.785             |
| CD178     | FASLG          | 0.462                   | 0.316             | 0.627             |
| CD180     | CD180          | 0.459                   | 0.73              | 0.641             |
| CD181     | CXCR1          | 0.136                   | 0.654             | 0.145             |
| CD183     | CXCR3          | 0.494                   | 0.357             | 0.578             |
| CD184     | CXCR4          | 0.362                   | 0.601             | 0.466             |
| CD193     | CCR3           | 5.98                    | 1.3               | 0.211             |
| CD195     | CCR5           | 0.57                    | 0.261             | 1.33              |
| CD196     | CCR6           | 0                       | 0.592             | 0.964             |
| CD197     | CCR7           | 0.318                   | 0.608             | 0.453             |
| CD200     | CD200          | 6.9                     | 12.3              | 1.49              |
| CD205     | LY75           | 0.197                   | 0.289             | 0.372             |
| CD206     | MRC1           | 0.38                    | 4.51              | 0.655             |
| CD209     | CD209          | 0.067                   | 2.99              | 0.126             |
| CD220     | INSR           | 0.645                   | 0.155             | 0.063             |
| CD221     | IGF1R          | 0.916                   | 0.172             | 0.673             |
| CD226     | CD226          | 0.381                   | 0.142             | 0.254             |
| CD227     | MUC1           | 46.2                    | 8.74              | 0.814             |
| CD229     | LY9            | 0.779                   | 0.996             | 0.95              |
| CD231     | TSPAN7         | 0.525                   | 0.42              | 0.371             |
| CD235a    | GYP A          | 0.038                   | 0.076             | 1.53              |
| CD243     | ABCB1          | 2.43                    | 15.4              | 3.35              |
| CD244     | CD244          | 0.615                   | 0.613             | 1.25              |
| CD255     | TNFSF12        | 0.53                    | 0.332             | 0.399             |
| CD268     | TNFRSF13C      | 0.143                   | 0.19              | 0.032             |
| CD271     | NGFR           | 0.837                   | 77.6              | 0.962             |

(continued)

SUPPLEMENTARY TABLE S2. (CONTINUED)

| <i>CD</i>                                         | <i>Gene ID</i> | <i>Undifferentiated</i> | <i>Adipogenic</i> | <i>Osteogenic</i> |
|---------------------------------------------------|----------------|-------------------------|-------------------|-------------------|
| CD273                                             | PDCDILG2       | 38.6                    | 0.353             | 0.139             |
| CD274                                             | CD274          | 0.781                   | 0.131             | 0.282             |
| CD275                                             | ICOSLG         | 0.115                   | 2.01              | 0.401             |
| CD278                                             | ICOS           | 0.501                   | 0.837             | 0.18              |
| CD279                                             | PDCD1          | 0.343                   | 0.543             | 0.399             |
| CD282                                             | TLR2           | 0.446                   | 5.26              | 0.443             |
| CD305                                             | LAIR1          | 0.83                    | 7.44              | 4.01              |
| CD309                                             | KDR            | 0.261                   | 0.393             | 0.117             |
| CD314                                             | KLRK1          | 0.682                   | 0.945             | 0.446             |
| CD321                                             | F11R           | 0.919                   | 36.8              | 5.31              |
| CDw327                                            | SIGLEC6        | 0.052                   | 0.509             | 0.061             |
| CDw328                                            | SIGLEC7        | 0.628                   | 3.99              | 0.33              |
| CDw329                                            | SIGLEC9        | 0.861                   | 5.15              | 1.09              |
| CD335                                             | NCR1           | 0.7                     | 0.638             | 0.617             |
| CD336                                             | NCR2           | 0.86                    | 0.872             | 0.537             |
| CD337                                             | NCR3           | 0.878                   | 0.888             | 0.276             |
| CD338                                             | ABCDG2         | 0.109                   | 0.373             | 0.449             |
| CD340                                             | ERBB2          | 23.2                    | 3.88              | 0.415             |
| abTCR                                             | IP26           | 0.279                   | 0.713             | 0.052             |
| B2-uGlob                                          | B2M            | 99.9                    | 68.3              | 82.3              |
| BLTR-1                                            | BLTR1          | 0.629                   | 1.3               | 0.109             |
| CLIP                                              | CLIP1          | 0.974                   | 0.799             | 0.464             |
| CMRF-44                                           | CMRF-44        | 0.468                   | 3.15              | 0.113             |
| CMRF-56                                           | CMRF-56        | 0.041                   | 2.43              | 0.318             |
| EGF-r                                             | EGFR           | 79.6                    | 33.8              | 0.776             |
| Fmlp-r                                            | FPR2           | 0.722                   | 4.51              | 0.491             |
| gd TCR                                            | CD3D           | 0.25                    | 0.34              | 0.903             |
| Hem. prog. cell                                   |                | 11.5                    | 11.8              | 3.01              |
| HLA-A,B,C                                         | HLAA           | 98.7                    | 92.4              | 97.3              |
| HLA-A2                                            | HLAA           | 67.1                    | 66.8              | 70.5              |
| HLA-DQ                                            | HLA-DQ         | 0.002                   | 4.51              | 3.11              |
| HLA-DR                                            | HLA-DR         | 2.41                    | 10.8              | 3.95              |
| HLA-DR,DP,DO                                      | HLA-DR         | 0.773                   | 8.34              | 4.72              |
| Invariant NKT                                     | 912            | 0.037                   | 0.064             | 0.524             |
| GD2                                               | B4GALNT1       | 0.083                   | 1.67              | 23.8              |
| MIC A/B                                           | MIC            | 0.533                   | 0.397             | 2.39              |
| NKB1                                              | KIR3DL1        | 0.01                    | 0.473             | 0.495             |
| SSEA-1                                            | FUT4           | 0.413                   | 3.67              | 0.514             |
| SSEA-4                                            | SSEA-4         | 6.34                    | 16.3              | 4.04              |
| TRA-1-60                                          | PODXL          | 0.728                   | 0.901             | 0.685             |
| TRA-1-81                                          | PODXL          | 0                       | 0.317             | 0.208             |
| Vb 23                                             |                | 0.101                   | 0.222             | 0.517             |
| Vb 8                                              | COX5BP8        | 0                       | 0.476             | 0.213             |
| CD49f                                             | ITGA6          | 1.5                     | 33.6              | 0.152             |
| CD104                                             | ITGB4          | 1                       | 4.26              | 2.59              |
| CD120b                                            | TNFRSF1B       | 0.921                   | 4.58              | 2.81              |
| CD132                                             | IL2RG          | 0.185                   | 6.31              | 3.25              |
| CD201                                             | PROCR          | 92.4                    | 31.4              | 34.9              |
| CD210                                             | IL10RA         | 0.56                    | 1.83              | 0.845             |
| CD212                                             | IL12RB1        | 0.243                   | 0.147             | 0.793             |
| CD267                                             | TNFRSF13B      | 0.033                   | 0.933             | 0.448             |
| CD294                                             | PTGDR2         | 0.854                   | 0.338             | 0.227             |
| CD326                                             | CD326          | 0.738                   | 0.361             | 1.7               |
| Cutaneous T-cell lymphoma<br>associated antigen 1 | CTAGE1         | 0                       | 0.13              | 0.953             |
| INT B7                                            | INTB7          | 0.028                   | 0.2               | 0.518             |
| SSEA-3                                            | SSEA-3         | 0.219                   | 1.75              | 0.857             |

Mean percentage of positive cells for each surface marker (with gene ID and CD nomenclature) assayed across each of the three donor hASC populations.

hASC, human adipose-derived stromal cell.
